# Supplementary material for: Interrogation of alternative splicing events in duplicated genes during evolution
Source: PubMed Central journal article supplement (PMC3333175; doi:10.1186/1471-2164-12-s3-s16), 2011-11-30

**# of domain distribution (>50)**

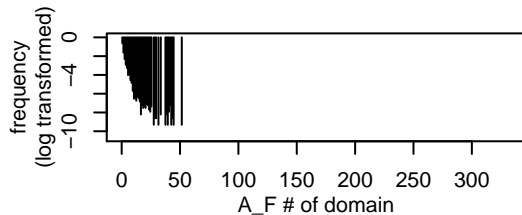

**# of domain distribution (>90)**

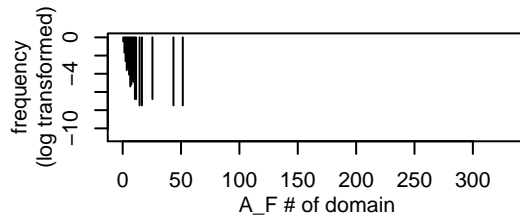

**# of domain distribution (>50)**

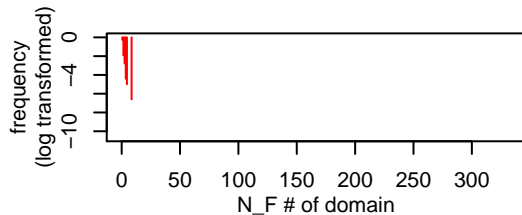

**# of domain distribution (>90)**

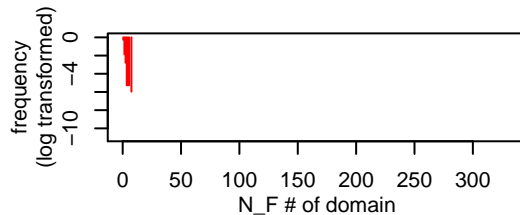

**# of domain distribution (>50)**

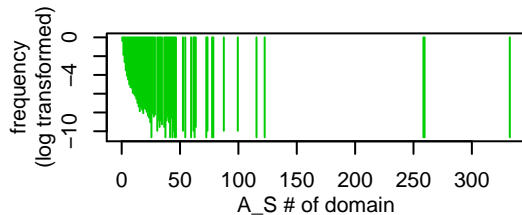

**# of domain distribution (>90)**

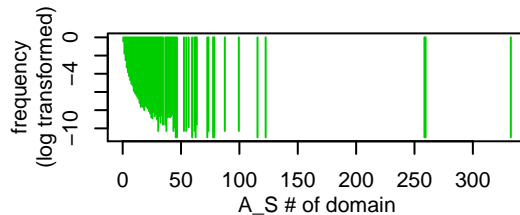

**# of domain distribution (>50)**

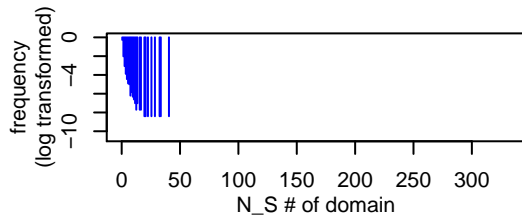

**# of domain distribution (>90)**

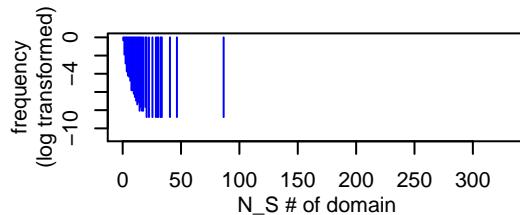

Supplement: 1471-2164-12-S3-S16-S2.pdf [file 1471-2164-12-S3-S16-S2.pdf]
